# Issues and Updates

## ADA Events

### **The 1995 Diabetic Foot Update: A Multidisciplinary Approach** 8–10 December 1995

**San Antonio, TX**

**Location:** San Antonio Convention Center

**Sponsorship:** The American Diabetes Association, Texas Affiliate, Inc., and The University of Texas Health Science Center at San Antonio, Department of Orthopaedics

**Credit:** 18 hours Category 1 of the AMA's PRA

**Contact:** Office of Continuing Medical Education, The University of Texas Health Science Center at San Antonio, 7703 Floyd Curl Dr., San Antonio, TX 78284-7980. Tel: 210-567-4444. Fax: 210-567-6964.

### **43rd Annual Postgraduate Course** 19–21 January 1996

**New York, NY**

**Sponsorship:** The American Diabetes Association

**Contact:** American Diabetes Association, Professional Education Department, 1660 Duke Street, Alexandria, VA 22314. Tel: 703-549-1500 or toll-free 800-232-3472, ext. 2212 or 2215 for program information; ext. 2453 or 2330 for registration materials. Fax: 703-683-1839 or 703-683-1351. E-mail: meetings@diabetes.org.

### **32nd Annual Colorado Diabetes/Endocrine Institute** 20–25 January 1996

### **Aspen-Snowmass, CO**

**Sponsorship:** The American Diabetes Association, Colorado Affiliate and the Colorado Society for Endocrinology

**Contact:** Becky Burtis, American Diabetes Association, 2450 S. Downing St., Denver, CO 80210. Tel: 303-778-7556.

### **University of the West Indies Second International Conference and Postgraduate Course**

**22–25 February 1996**

**Ocho Rios, Jamaica**

**Sponsorship:** The American Diabetes Association

**Contact:** American Diabetes Association, Professional Education Department, 1660 Duke Street, Alexandria, VA 22314. Tel: 703-549-1500 or toll-free 800-232-3472, ext. 2212 or 2215 for program information; ext. 2453 or 2330 for registration materials. Fax: 703-683-1839 or 703-683-1351. E-mail: meetings@diabetes.org.

### **Genetics of Diabetes Research Symposium**

**21–24 March 1996**

**Denver, CO**

**Sponsorship:** The American Diabetes Association

**Contact:** American Diabetes Association Professional Education Department, 1660 Duke St., Alexandria, VA 22314. Tel: 703-549-1500 or toll-free 800-232-3472, ext. 2215 for program information; ext. 2453 or 2330 for registration materials. Fax: 703-683-1839 or 703-683-1351. E-mail: meetings@diabetes.org.

### **56th Annual Meeting and Scientific Sessions**

**8–11 June 1996**

**San Francisco, CA**

**Deadline:** Friday, 5 January 1996 for abstracts.

**Sponsorship:** The American Diabetes Association

**Contact:** American Diabetes Association, Professional Education Department, 1660 Duke Street, Alexandria, VA 22314. Tel: 703-549-1500 or toll-free 800-232-3472, ext. 2212 or 2215 for program information; ext. 2453 or 2330 for registration materials. Fax: 703-683-1839 or 703-683-1351. E-mail: meetings@diabetes.org. E-mail for abstracts: abstracts@diabetes.org.

## Other Events

### **15th Workshop of EASD on AIDSPIT** 28–30 January 1996

**Igls, Austria**

**Deadline:** 15 October 1995 for abstracts.  
**Sponsorship:** Artificial Insulin Delivery Systems Pancreas and Islet Transplantation Study Group of the European Association for the Study of Diabetes

**Topics:** Insulin pumps, islet isolation and experimentation, clinical pancreas/islet transplantation, glucose sensing, bioartificial pancreas, novel aspects of IDDM therapy, immunological aspects of transplantation and artificial organs.

**Contact:** AIDSPIT Secretariat, Hotel-Dieu, Secretariat de Diabetologie, 1 Place du Parvis Notre Dame, 75181 Paris cedex

04, France. Tel: 33-1-42-34-83-78. Fax: 33-1-40-46-88-96.

**5th International Meeting on Trace Elements in Medicine and Biology**

**4–7 February 1996**

**Meribel, France**

**Sponsorship:** Société Francophone d'Etude et de Recherche sur les Eléments Trace Essentiels

**Topics:** Therapeutic forms, large epidemiological and intervention studies, supplementation of population groups at different periods of age, relation to bone physiology and bone diseases, treatment of inflammatory conditions and infections, relation to digestive diseases and endocrinology, pharmacological applications, genetic disorders of copper metabolism.

**Contact:** Madame Arlette Alcaraz, Laboratoire de Biochimie C-CHRUG-B.P. 217 F-38043, Grenoble Cedex 9, France. Tel: 33-76-76-54-84. Fax: 33-76-76-56-64.

**Third National Multi-Specialty Nursing Conference on Urinary Continence**  
**15–18 February 1996**

**Dallas, TX**

**Location:** Hyatt Regency Dallas

**Sponsorship:** Society of Urologic Nurses and Associates; the Wound, Ostomy and Continence Nurses Society; and the Association of Rehabilitation Nurses

**Contact:** Cheryl Underhill, SUNA National Office, E. Holly Ave. Box 56, Pitman, NJ 08071-0056. Tel: 609-256-2335. Fax: 609-589-7463.

**Diabetes Lipoproteins and Atherosclerosis**

**29–31 March 1996**

**Dublin, Ireland**

**Sponsorship:** European Association for the Study of Diabetes (EASD), the British Hyperlipidaemia Association, and the Irish Hyperlipidaemia Association

**Contact:** Professor G.H. Tomkin, 1 Fitzwilliam Square, Dublin 2, Ireland. Tel: 353-1-6761639. Fax: 353-1-6767122.

**9th Annual General Meeting of the European Diabetic Nephropathy Study Group**

**3–4 May 1996**

**Parma, Italy**

**Sponsorship:** EDNSG, an official study group of the European Association for the Study of Diabetes

**Contact:** Ruggero Mangili, MD, Divisione Medicina I, Istituto Scientifico San Raffaele, Via Olgettina 60, I-20132 Milan, Italy. Tel: 39-2-2643-2121. Fax: 39-2-2643-3790. E-mail: mangili@rsisi.hsr.it.

**International Symposium on Endocrine Cell Transplantation and Genetic Engineering**

**16–19 June 1996**

**Giessen, Germany**

**Location:** Congress Hall

**Sponsorship:** The Endocrine Society (Satellite Symposium to the 10th International Congress of Endocrinology 1996, San Francisco, CA), Justus-Liebig-University, Giessen

**Topics:** Experimental and clinical transplantation of islets of Langerhans, of neuroendocrine cells (e.g., adrenal, neural, and hypothalamic cells), of thyroid, parathyroid, and other adult or fetal endocrine tissue; basic scientific issues of bioartificial organs; genetic engineering of endocrine cells; and other related topics.

**Contact:** Prof. Dr. R.G. Bretzel, Third Medical Department, University of Giessen, Rodthohl 6, D-35385 Giessen, Germany. Tel: 49-641-702-7442 or 49-641-702-3700. Fax: 49-641-702-7443 or 49-641-702-3752.

**International Symposium on Sweeteners**

**14–20 July 1996**

**Jerusalem, Israel**

**Location:** Jerusalem Renaissance Hotel

**Sponsorship:** The International Union of Pure and Applied Chemistry and the Hebrew University of Jerusalem

**Contact:** The Secretariat, Jerusalem International Symposium on Sweeteners, P.O. Box 50006, Tel-Aviv 61500, Israel. Tel: 972-3-5140014. Fax: 972-3-5175674,

972-3-5140077. E-mail: 100274.2665@CompuServe.COM.

**6th International Seminar on the Epidemiology and Public Health Aspects of Diabetes Mellitus**

**21–31 July 1996**

**Cambridge, U.K.**

**Location:** Clare College

**Sponsorship:** University of Cambridge

**Contact:** Dr. N.J. Wareham, Institute of Public Health, University of Cambridge, Robinson Way, Cambridge, CB2 2SR U.K. Fax: 44-1223-330330. E-mail: njw1004@medschl.cam.ac.uk.

**3rd International Diabetes Federation Western Pacific Regional Congress: Diabetes: Toward the New Millennium**

**25–28 September 1996**

**Hong Kong**

**Location:** The Hong Kong Convention and Exhibition Center

**Sponsorship:** Society for the Study of Endocrinology, Metabolism and Reproduction (SSEMR), Hong Kong, and the International Diabetes Federation Western Pacific Region

**Contact:** Dr. John Ma, c/o Congress Secretariat, Meeting Planners (HK) Ltd., 12A Dai Fat St., Tai Po Industrial Estate, Tai Po, NT, Hong Kong. Tel: 852-2665-0990. Fax: 852-2667-6927.

**ADA Scientific Awards**

**Banting Medal for Scientific Achievement**

**Award:** To honor highly meritorious career achievement in the field of diabetes research. The highest scientific award of the American Diabetes Association. Award recipient receives a medal and an honorarium of \$2,000 and will deliver the Banting Lecture at the Association's June Scientific Sessions. The recipient will also have the opportunity to publish

the lecture in an American Diabetes Association journal.

**Deadline:** 1 December 1995.

**Conditions:** Demonstrated significant long-term contributions to our understanding of diabetes and its treatment and/or prevention. Publications and teaching experience are primary factors in the selection process. Nominees must hold an MD or PhD degree; non-U.S. residents are eligible. A copy of the nominee's CV and a detailed letter explaining why the individual merits consideration must be submitted.

**Contact:** Frank Vinicor, MD, MPH, President, c/o Barbara Akin, Organizational Affairs, American Diabetes Association, 1660 Duke St., Alexandria, VA 22314.

#### Outstanding Scientific Achievement

**Award:** To recognize outstanding scientific achievement in the field of diabetes, taking into consideration independence of thought and originality. Award recipient receives a medal and an honorarium of \$1,000 and will deliver the Lilly Lecture at the Association's June Scientific Sessions.

**Deadline:** 1 December 1995.

**Conditions:** Nominee must be actively engaged in the line of research for which the award is to be made. Nominee must hold an MD or PhD degree and must be less than 45 years of age on 1 January 1996. Nominee should be a resident of the U.S. or Canada. A copy of the nominee's CV and a detailed letter explaining why the individual merits consideration must be submitted.

**Contact:** Liliane Striker, MD, Chair, Research Grant Review Panel, c/o Barbara Akin, Organizational Affairs, American Diabetes Association, 1660 Duke St., Alexandria, VA 22314.

#### Outstanding Clinician in Diabetes

**Award:** To stimulate, acknowledge, and reward clinicians for outstanding efforts in the field of diabetes care. Award recip-

ient receives a medal and an honorarium of \$1,000.

**Deadline:** 1 December 1995.

**Conditions:** Nominee should be a recognized clinician with many years of distinguished clinical medicine experience and be well-known locally, nationally, and, ideally, internationally. Nominee must be a member of the Association's professional section. The nominee's publication record as it relates to book chapters and review articles, as well as teaching experience, will be considered. Also, the scope of the nominee's clinical practice experience and the influence of the nominee's activities at the local, state, national, or international level are important factors. A copy of the nominee's CV and a detailed letter explaining why the individual merits consideration must be submitted.

**Contact:** Robert Rizza, MD, Chair, Professional Practice Committee, c/o Barbara Akin, Organizational Affairs, American Diabetes Association, 1660 Duke St., Alexandria, VA 22314.

#### Kelly West Lecture and Award

**Award:** In memory of Dr. Kelly West, the Council on Epidemiology and Statistics selects the recipient of the Kelly West Lecture and Award in honor of significant contributions to the field of diabetes epidemiology. Award recipient receives a plaque and an honorarium at the Council's June meeting and gives a lecture.

**Deadline:** 1 December 1995.

**Conditions:** Research contributions and significance of the nominee's work as it is related to the epidemiology of diabetes and its complications are the selection criteria. Nominees must hold a PhD, MD, MPH, or equivalent degree. Non-U.S. residents are eligible. A copy of the nominee's CV and a detailed letter explaining why the individual merits consideration must be submitted.

**Contact:** Wilfred Y. Fujimoto, MD, Council Chair, c/o Barbara Akin, Organizational Affairs, American Diabetes Association, 1660 Duke St., Alexandria, VA 22314.

## ADA Educational Awards

#### Outstanding Physician Educator in Diabetes

**Award:** To stimulate, acknowledge, and reward outstanding educational efforts by physicians in the field of diabetes. Award recipient receives a medal and an honorarium of \$1,000.

**Deadline:** 1 December 1995.

**Conditions:** Nominee should be an excellent lecturer and/or innovator in the field of education. Nominee should be well-known locally, nationally, and, ideally, internationally. Nominee must be a current member of the Association's professional section. Consideration will be given to the experience and impact of the nominee in the area of professional education, the number of years in the field, the uniqueness of the effort, and how this individual differs from others who lecture or publish. A bibliography that supports the nominee's activity as an educator should be provided. A copy of the nominee's CV and a detailed letter explaining why the individual merits consideration must be submitted.

**Contact:** Robert Rizza, MD, Chair, Professional Practice Committee, c/o Barbara Akin, Organizational Affairs, American Diabetes Association, 1660 Duke St., Alexandria, VA 22314.

#### Outstanding Educator in Diabetes

**Award:** To stimulate, acknowledge, and reward outstanding educational efforts by allied health professionals in the field of diabetes. Award recipient receives a plaque and an honorarium of \$1,000 and will deliver a lecture at the Annual Meeting.

**Deadline:** 1 December 1995.

**Conditions:** Nominee should be an excellent lecturer and/or innovator in the field of education. Nominee should be well-known locally, nationally, and, ideally, internationally. Nominee must be a current member of the Association's pro-

fessional section and cannot be a physician. Consideration will be given to the experience and impact of the nominee in the area of professional education, the number of years in the field, the uniqueness of the effort, and how this individual differs from others who lecture or publish. A bibliography that supports the nominee's activity as an educator should be provided. A copy of the nominee's CV and a detailed letter explaining why the individual merits consideration must be submitted.

**Contact:** Davida F. Kruger, MSN, RN, C, CDE, Senior Vice President, c/o Barbara Akin, Organizational Affairs, American Diabetes Association, 1660 Duke St., Alexandria, VA 22314.

#### **Albert Renold Award**

**Award:** To honor an individual who has a career that is distinguished by outstanding achievements in the training of diabetes research scientists or the facilitation of diabetes research by investigators. Award recipient receives a plaque and an honorarium of \$1,000.

**Deadline:** 1 December 1995.

**Conditions:** The nominee must have been instrumental in the training of diabetes research scientists or in the facilitation of diabetes research. The nominee should have a distinguished career as a mentor. The nominee must have an MD, PhD, or MPH degree or equivalent; non-U.S. residents are eligible. The award is not necessarily given every year. A copy of the nominee's CV and a detailed letter explaining why the individual merits consideration must be submitted.

**Contact:** Frank Vinicor, MD, MPH, President, c/o Barbara Akin, Organizational Affairs, American Diabetes Association, 1660 Duke St., Alexandria, VA 22314.

## *ADA Service Awards*

#### **Harold Rifkin Award for Distinguished International Service in the Cause of Diabetes**

**Award:** To honor outstanding service in the cause of diabetes that has been performed with an international perspective and with international impact. Award recipient receives a plaque.

**Deadline:** 1 December 1995.

**Conditions:** The nominee should be recognized for his/her volunteer service to one or more diabetes-related organizations. Contributions in diabetes research are not relevant and nominees do not have to be U.S. citizens. Nominees will be judged on the number of years they have contributed to the international effort and by the impact of their effort. The award is not necessarily given every year. A copy of the nominee's CV and a detailed letter explaining why the individual merits consideration must be submitted. No specific academic degree is preferred or required.

**Contact:** Frank Vinicor, MD, MPH, President, c/o Barbara Akin, Organizational Affairs, American Diabetes Association, 1660 Duke St., Alexandria, VA 22314.

#### **C. Everett Koop Medal for Health Promotion and Awareness**

**Award:** To honor individual excellence in wellness promotion and disease prevention. The award is not limited specifically to diabetes-related issues and messages although such messages will receive priority. Award recipient receives a medal.

**Deadline:** 1 December 1995.

**Conditions:** The nominee must have made a significant contribution to increasing public awareness about lifestyles and activities that pose potential hazards to general good health and well-being. Such effort must have resulted in the general public having a better understanding and acceptance of personal responsibility in ensuring one's own good health. The nominee should be a resident of the U.S. and can come from any arena: education, politics, business, media, sports, or science and medicine. A copy of the nominee's CV and a detailed letter explaining why the individual merits consideration must be submitted.

**Contact:** Frank Vinicor, MD, MPH, President, c/o Barbara Akin, Organizational

Affairs, American Diabetes Association, 1660 Duke St., Alexandria, VA 22314.

#### **Outstanding Contribution to Camping and Diabetes**

**Award:** To recognize and honor an individual who has made an outstanding contribution to the camping program. Award recipient receives a medal, and \$1,000 will be presented to young campers with diabetes who will be selected by the award winner.

**Deadline:** 1 December 1995.

**Conditions:** The nominee shall have made a significant contribution to camping regionally and/or nationally. This contribution should include years of service to the diabetes community, leadership in the American Diabetes Association, attendance at the International Diabetes Camping and Youth Services Conference, involvement in the camp affiliation accreditation process, and as an author of printed materials related to camping. A copy of the nominee's CV and a detailed letter explaining why the individual merits consideration must be submitted.

**Contact:** Ronald P. Monsaert, MD, Chair, Programs Committee, c/o Barbara Akin, Organizational Affairs, American Diabetes Association, 1660 Duke St., Alexandria, VA 22314.

#### **Outstanding Contribution to Diabetes in Youth**

**Award:** To recognize exceptional contributions of individuals who work with young people with diabetes. Award recipient receives a plaque, and \$1,000 will be presented to the winner's affiliate youth program.

**Deadline:** 1 December 1995.

**Conditions:** The nominee must have made significant contributions in working with children with diabetes and with families of children with diabetes. Consideration will also be given to the nominee's involvement in diabetes program activities, other community activities, and as an author of any printed materials that are related to working with youth. A copy

of the nominee's CV and a detailed letter explaining why the individual merits consideration must be submitted.

**Contact:** Ronald P. Monsaert, MD, Chair, Programs Committee, c/o Barbara Akin, Organizational Affairs, American Diabetes Association, 1660 Duke St., Alexandria, VA 22314.

#### Outstanding Affiliate Service

**Award:** To recognize volunteers for meritorious service to an affiliate association. Award recipient will receive a plaque and an honorarium of \$1,000.

**Deadline:** 1 December 1995.

**Conditions:** The nominee must be an outstanding volunteer with a minimum of five years of service. The nominee must be a leader at the affiliate and chapter levels and must be involved in fund-raising or as a donor. A copy of the nominee's CV and a detailed letter explaining why the individual merits consideration must be submitted.

**Contact:** John Allton, Chair, Affiliate Associations Committee, c/o Barbara Akin, Organizational Affairs, American Diabetes Association, 1660 Duke St., Alexandria, VA 22314.

#### Youth Leadership

**Award:** To recognize a young adult's leadership within the American Diabetes Association and the community. Recipient will receive a plaque, and \$1,000 will be presented to the winner's affiliate youth program.

**Deadline:** 1 December 1995.

**Conditions:** The nominee must be a young adult, 16–21 years old, and actively involved in local and/or national diabetes and youth activities. The nominee must have shown significant leadership at the chapter, affiliate, or national level. A copy of the nominee's CV and a detailed letter explaining why the individual merits consideration must be submitted.

**Contact:** Ronald P. Monsaert, MD, Chair, Programs Committee, c/o Barbara Akin, Organizational Affairs, American Diabetes Association, 1660 Duke St., Alexandria, VA 22314.

#### Outstanding Fund-Raising

**Award:** To recognize and stimulate exceptional leadership among volunteers working in the area of fund-raising. Recipient will receive a plaque, and \$1,000 will be presented to the winner's affiliate public support program.

**Deadline:** 1 December 1995.

**Conditions:** The nominee must have provided significant leadership in the area of fund raising in both affiliate and chapter level activities. This leadership should include years of service in developing fund-raising programs, involvement in their implementation, and substantial recruitment for their support. Consideration will also be given to public awareness generated through the activities of the fund-raising program, opportunity to involve media support of the program, and new sources of income generated through the program. A copy of the nominee's CV and a detailed letter explaining why the individual merits consideration must be submitted.

**Contact:** Louis B. Chaykin, MD, Chair, Fund Raising Committee, c/o Barbara Akin, Organizational Affairs, American Diabetes Association, 1660 Duke St., Alexandria, VA 22314.

#### Wendell Mayes, Jr. Medal

**Award:** To recognize outstanding volunteer service in the cause of diabetes. Recipient receives a medal and an honorarium of \$2,000.

**Deadline:** 1 December 1995.

**Conditions:** The nominee must be a non-health-professional volunteer. U.S. citizenship or residency is not required. A copy of the nominee's CV and a detailed

letter explaining why the individual merits consideration must be submitted.

**Contact:** David H. McClure, Chair of the Board, c/o Barbara Akin, Organizational Affairs, American Diabetes Association, 1660 Duke St., Alexandria, VA 22314.

#### Charles H. Best Medal for Distinguished Service in the Cause of Diabetes

**Award:** To recognize outstanding service in the cause of diabetes. Recipient receives a medal.

**Deadline:** 1 December 1995.

**Conditions:** The nominee should be a non-health professional or a health professional who is being honored for achievements in the cause of diabetes not associated with his/her professional expertise. A copy of the nominee's CV and a detailed letter explaining why the individual merits consideration must be submitted.

**Contact:** David H. McClure, Chair of the Board, c/o Barbara Akin, Organizational Affairs, American Diabetes Association, 1660 Duke St., Alexandria, VA 22314.

#### Addison B. Scoville Award for Outstanding Volunteer Service

**Award:** To acknowledge a member of the Board of Directors, or other volunteer, who has made an outstanding contribution to the American Diabetes Association. Recipient receives a plaque and an honorarium of \$1,000.

**Deadline:** 1 December 1995.

**Conditions:** The nominee must be a member of the Board of Directors or of a national committee of the American Diabetes Association. A copy of the nominee's CV and a detailed letter explaining why the individual merits consideration must be submitted.

**Contact:** David H. McClure, Chair of the Board, c/o Barbara Akin, Organizational Affairs, American Diabetes Association, 1660 Duke St., Alexandria, VA 22314.
